# Supplementary material
Source: publisher figshare collection journal article supplement (https://acs.figshare.com/ndownloader/files/4634452)
Supplement: Supplementary file 1 [file 4634452]

Supporting information:

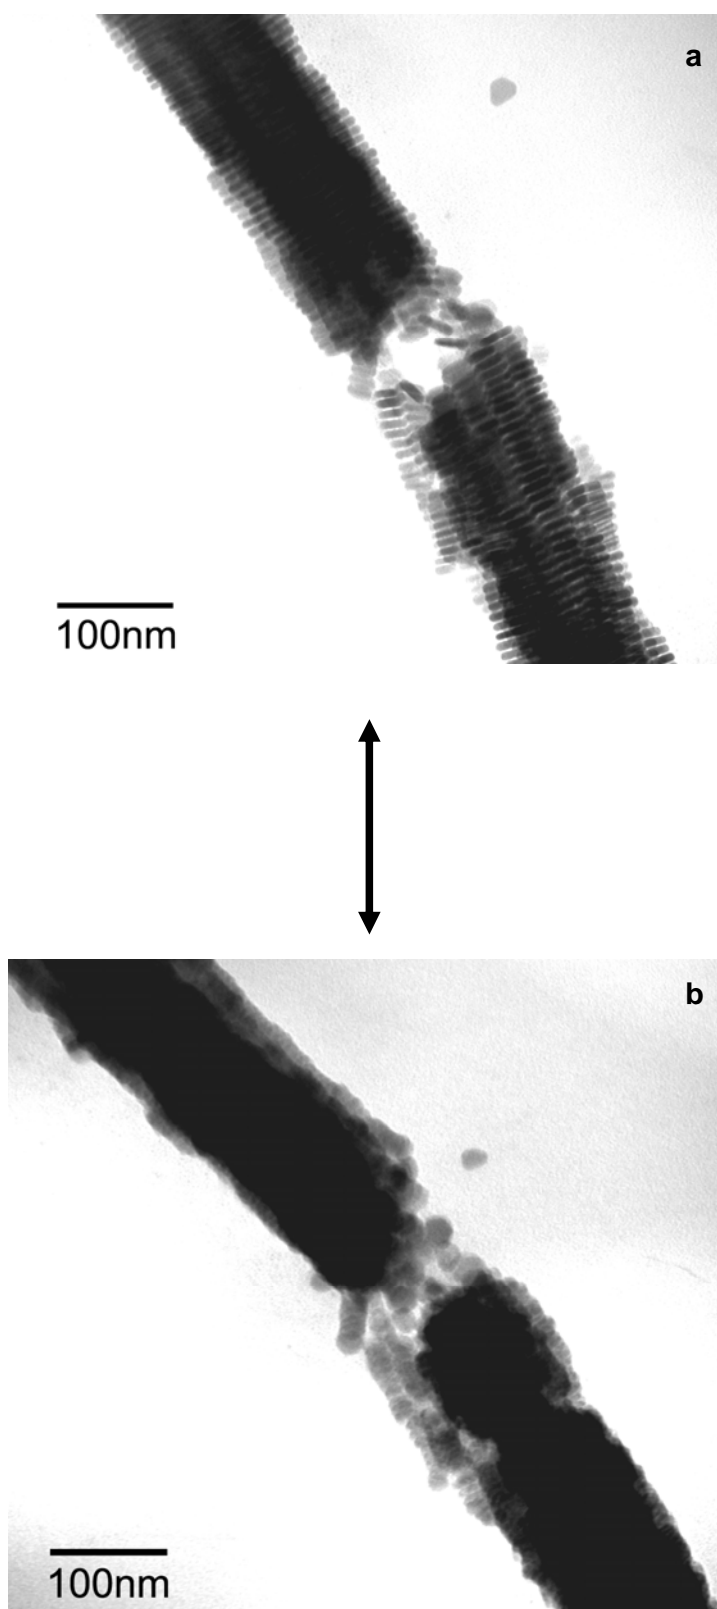

(S1) TEM images of the self assembly  $\text{Cu}_2\text{S}$  nanostructure

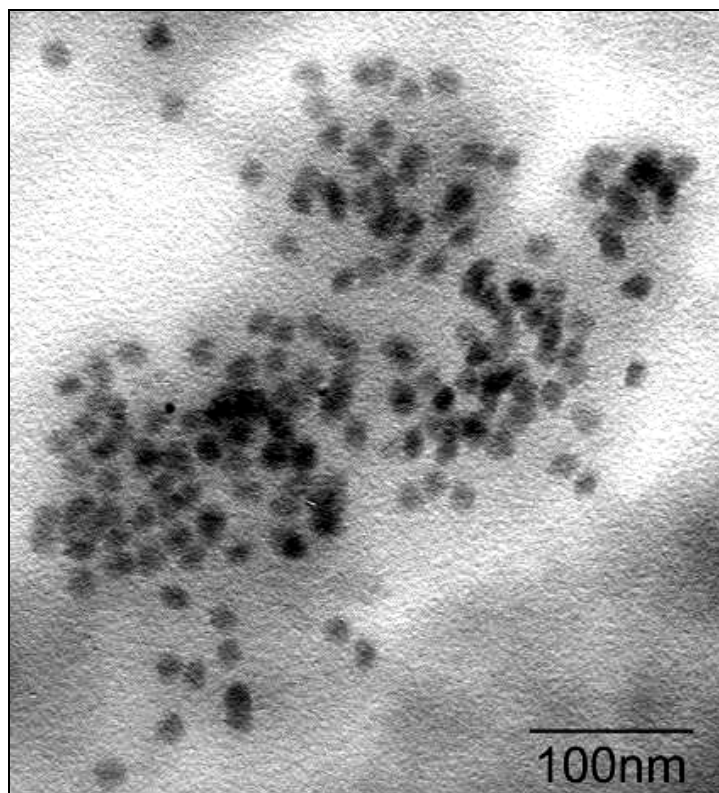

**(S2):** TEM images of the copper sulfide nanocrystals prepared at 180 °C for 0.3 h.

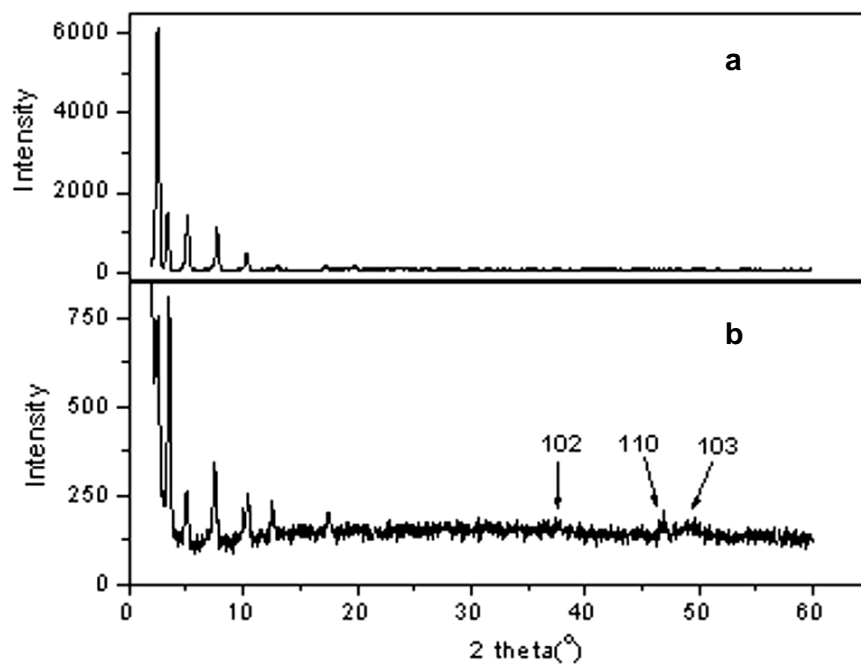

**S3.** XRD patterns of (a) the copper dodecanthiolate precursor, and (b) the products prepared at 200 °C for 1 h.

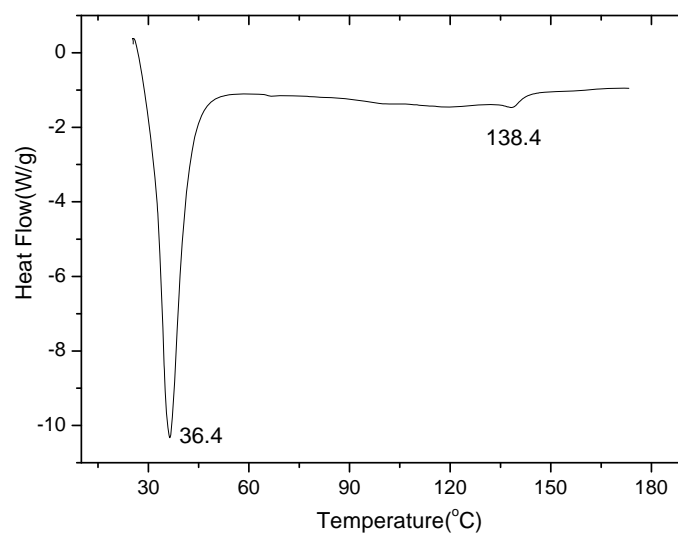

**S4.** DSC traces of the products prepared at 200 °C for 1 h.

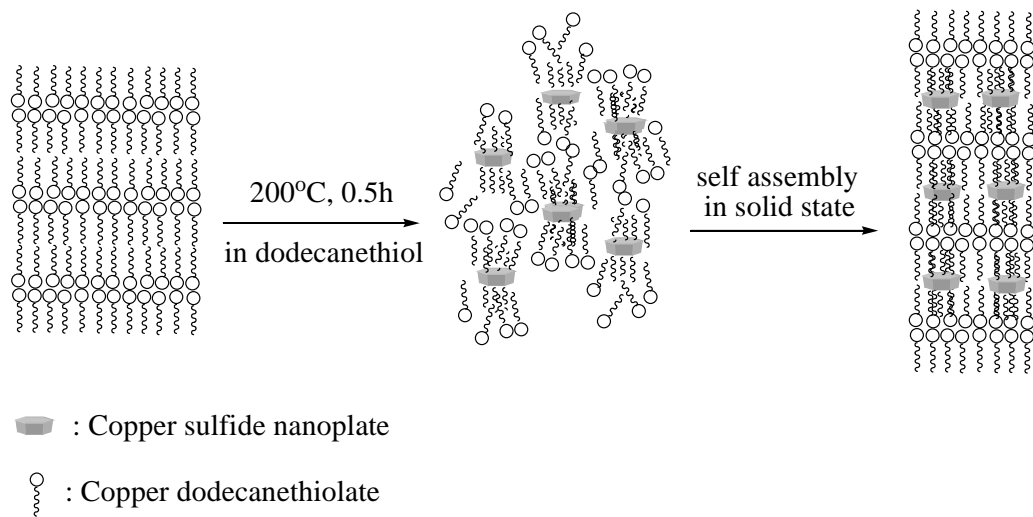

**S5.** Illustration of the proposed growth and self assembly process of copper sulfide nanoplates.
